# Supplementary material
Source: Springer Nature journal article supplement (https://www.springerprofessional.de/resource/supplementary/13638_2011_112_MOESM4_ESM.pdf/11897068)
Supplement: MOESM4 [file 11897068]

Node Mobility

```
graph TD; NM[Node Mobility] --> DCA[DCA Server Node Mobility]; NM --> UNM[User Node Mobility]; NM --> RM[Repository Node Mobility]; UNM --> MBD[Mobility between Administrative Domains]; UNM --> MWAD[Mobility within Administrative Domain];
```

DCA Server Node  
Mobility

User Node  
Mobility

Repository  
Node Mobility

Mobility between  
Administrative Domains

Mobility within  
Administrative Domain
